# Supplementary material for: A Flexible Tool to Correct Superimposed Mass Isotopologue Distributions in GC-APCI-MS Flux Experiments
Source: MDPI journal article supplement (doi:10.3390/metabo12050408), 2022-04-29

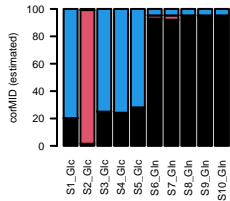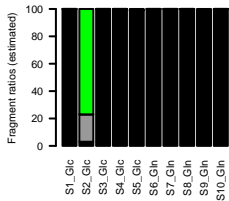

cor MI

- M0
- M1
- M2
- M3
- M4
- M5
- M6

ratios

- M+H
- M+
- M-H
- M+H<sub>2</sub>O-CH<sub>4</sub>

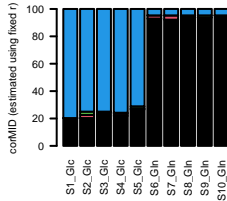

Pyruvic acid (-CH<sub>4</sub>)

M+H = 100

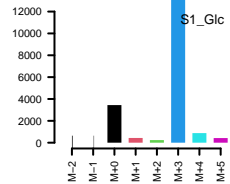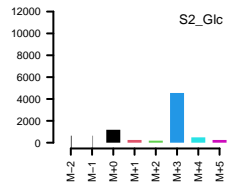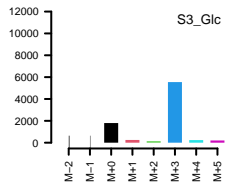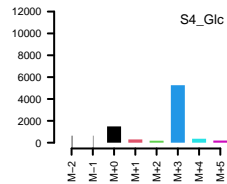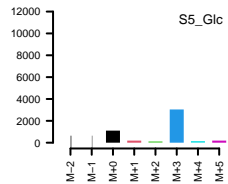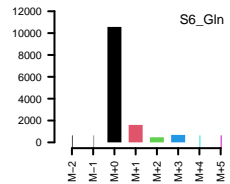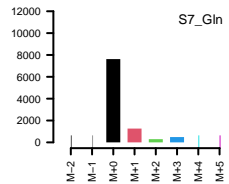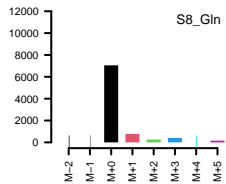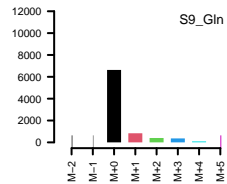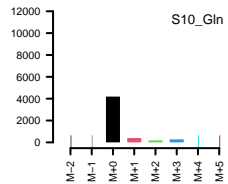

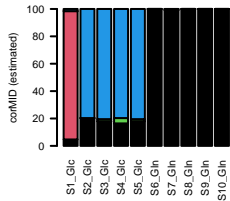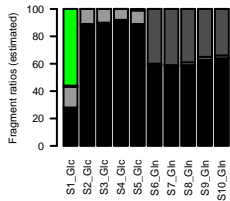

cor MI

- M0
- M1
- M2
- M3
- M4
- M5
- M6

ratios

- M+H
- M+
- M-H
- M+H<sub>2</sub>O-CH<sub>4</sub>

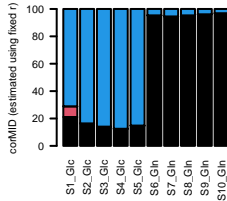

Lactic acid (2TMS)

M+H = 73.8  
M+ = 5.8  
M-H = 20.3

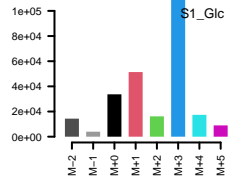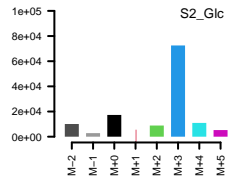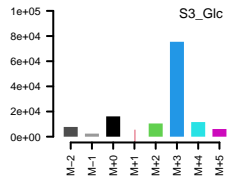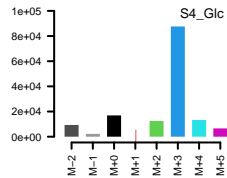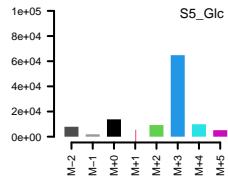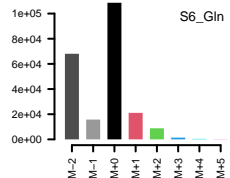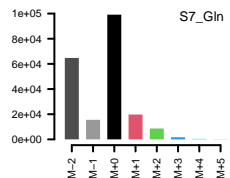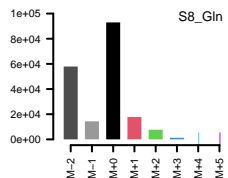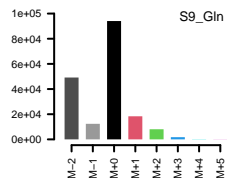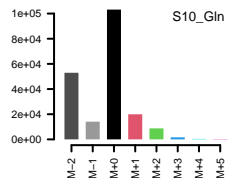

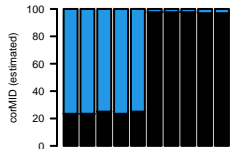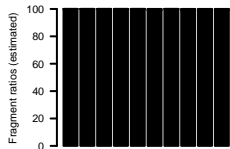

cor MI

- M0
- M1
- M2
- M3
- M4
- M5
- M6

ratios

- M+H
- M+
- M-H
- M+H<sub>2</sub>O-CH<sub>4</sub>

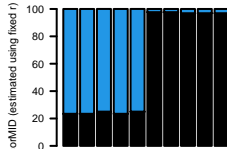

Alanine (2TMS)

M+H = 100

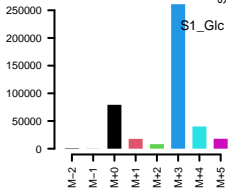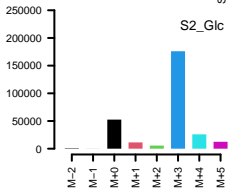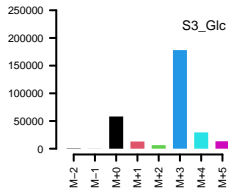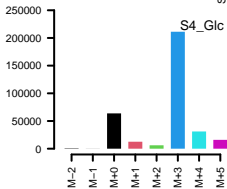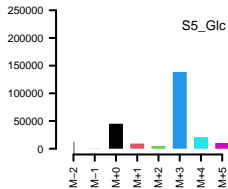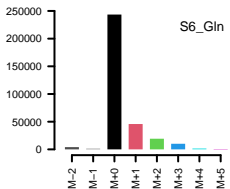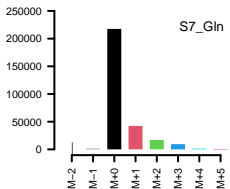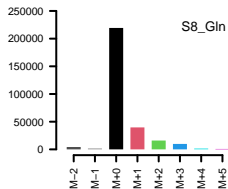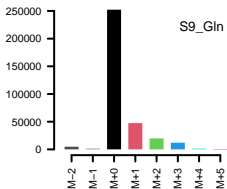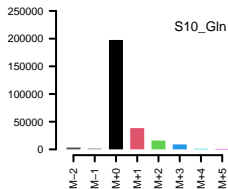

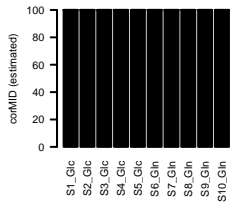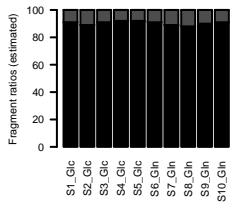

cor MI

- M0
- M1
- M2
- M3
- M4
- M5
- M6

ratios

- M+H
- M+
- M-H
- M+H<sub>2</sub>O-CH<sub>4</sub>

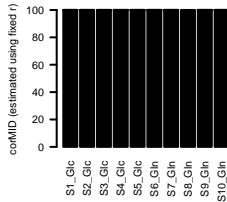

Glycerol (3TMS)

M+H = 91

M-H = 9

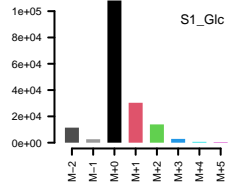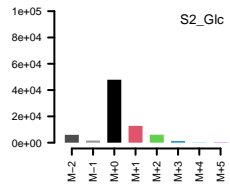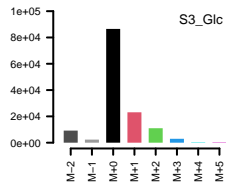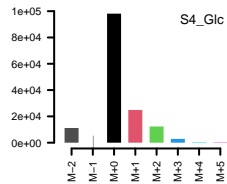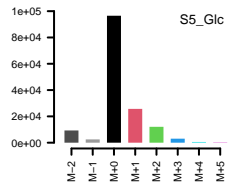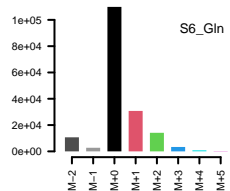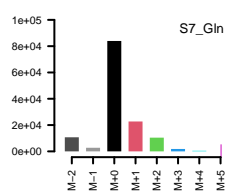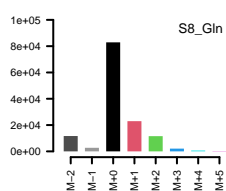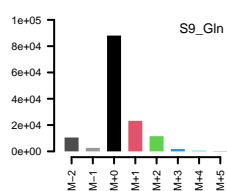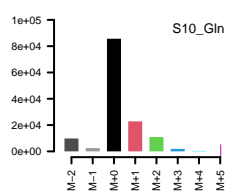

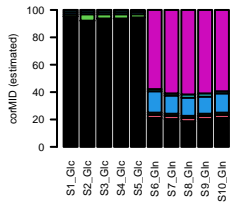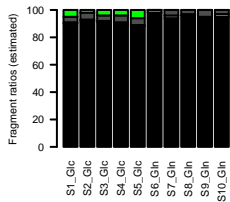

cor MI

M0  
M1  
M2  
M3  
M4  
M5  
M6

ratios

M+H  
M+  
M-H  
M+H<sub>2</sub>O-CH<sub>4</sub>

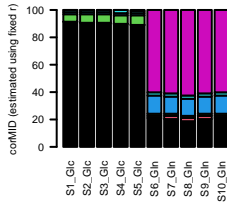

Proline (2TMS)

M+H = 93.9

M+ = 1

M-H = 4

M+H<sub>2</sub>O-CH<sub>4</sub> = 1

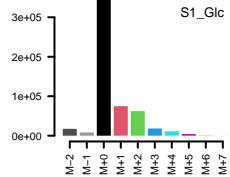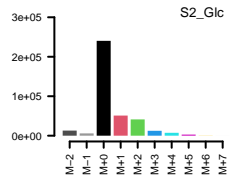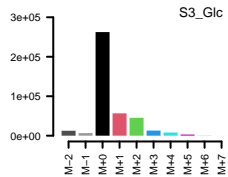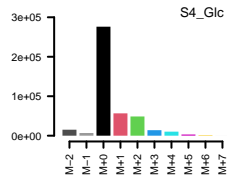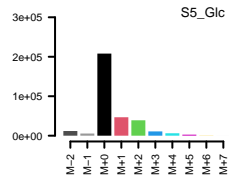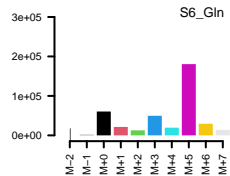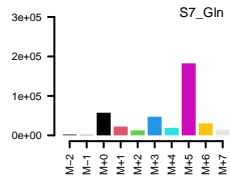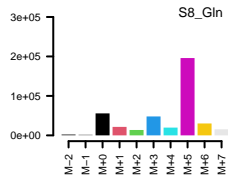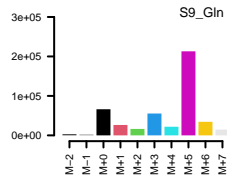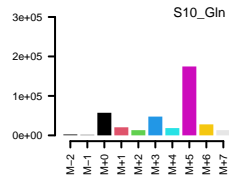

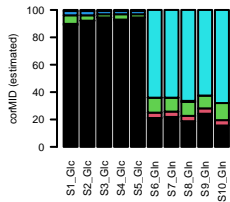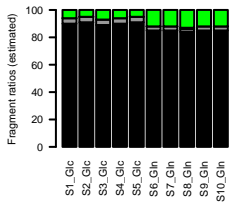

cor MI

- M0
- M1
- M2
- M3
- M4
- M5
- M6

ratios

- M+H
- M+
- M-H
- M+H<sub>2</sub>O-CH<sub>4</sub>

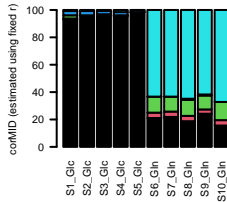

Succinic acid (-O-TMS)

M+H = 87

M+ = 3.5

M+H<sub>2</sub>O-CH<sub>4</sub> = 9.5

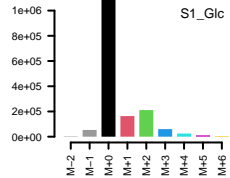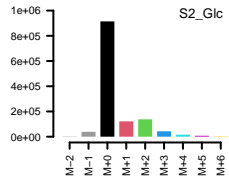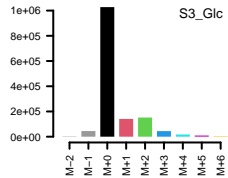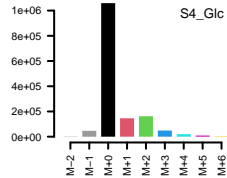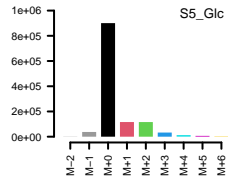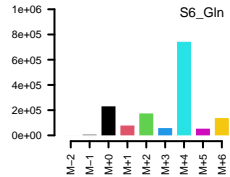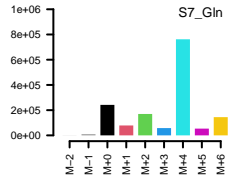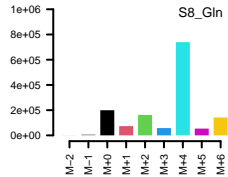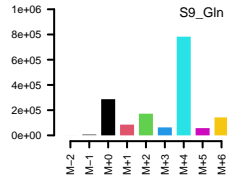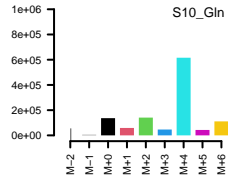

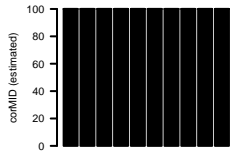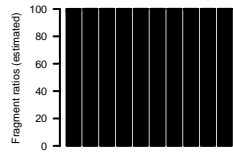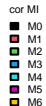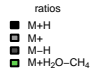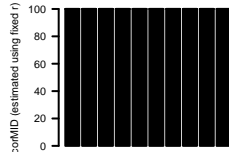

Glycine (3TMS)

M+H = 100

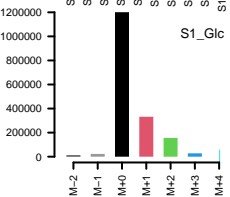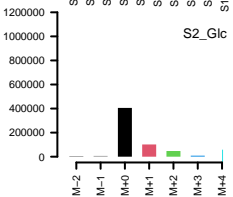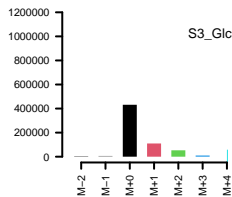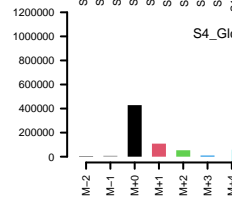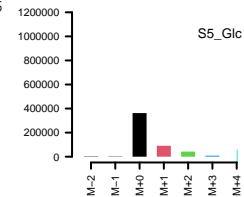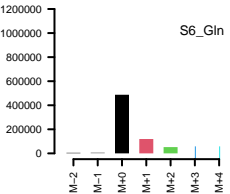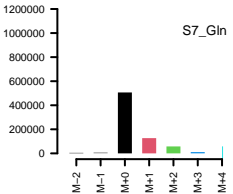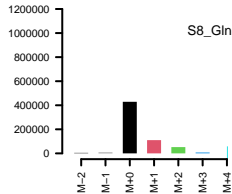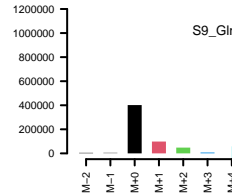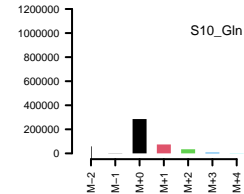

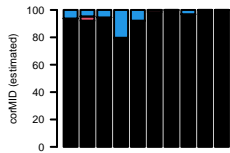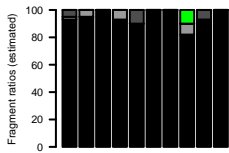

cor MI

- M0
- M1
- M2
- M3
- M4
- M5
- M6

ratios

- M+H
- M+
- M-H
- M+H<sub>2</sub>O-CH<sub>4</sub>

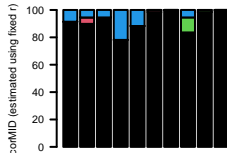

Glyceric acid (3TMS)

M+H = 100

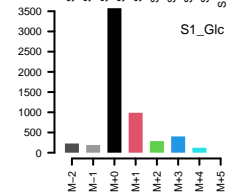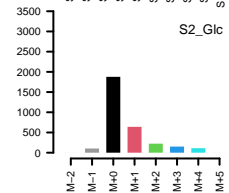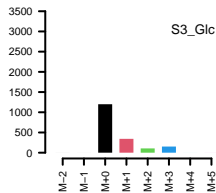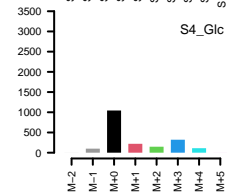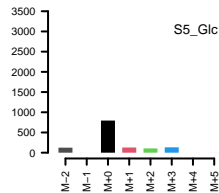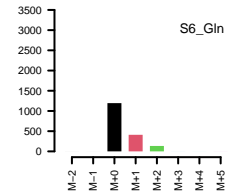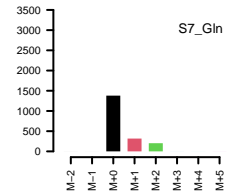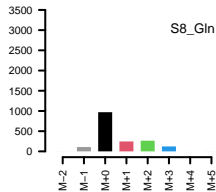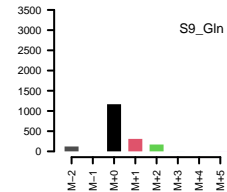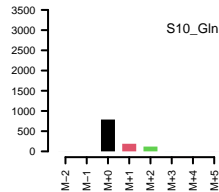



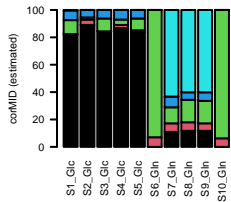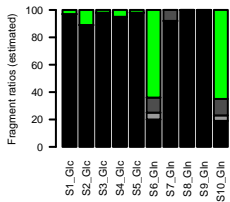

cor MI

- M0
- M1
- M2
- M3
- M4
- M5
- M6

ratios

- M+H
- M+
- M-H
- M+H<sub>2</sub>O-CH<sub>4</sub>

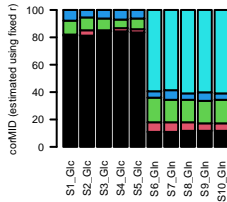

Fumaric acid (-CH<sub>4</sub>)

M+H = 97.5

M+H<sub>2</sub>O-CH<sub>4</sub> = 2.5

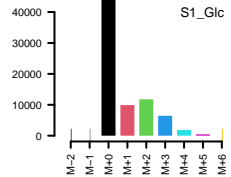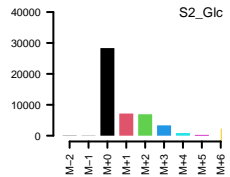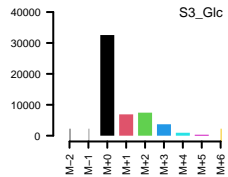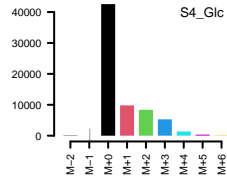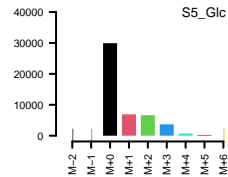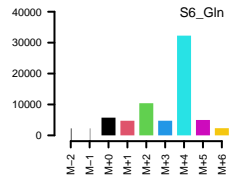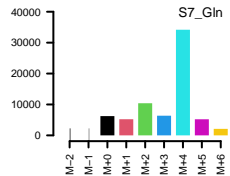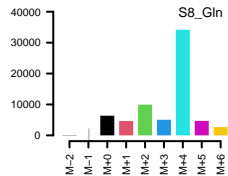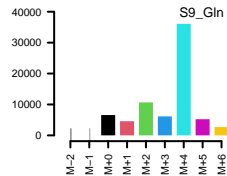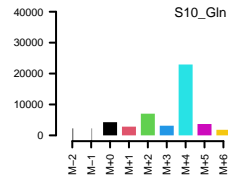

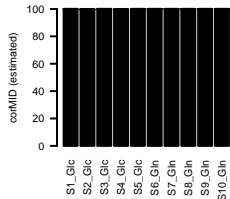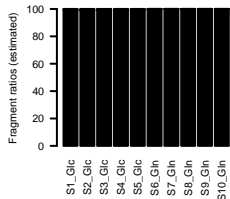

cor MI

- M0
- M1
- M2
- M3
- M4
- M5
- M6

ratios

- M+H
- M+
- M-H
- M+H<sub>2</sub>O-CH<sub>4</sub>

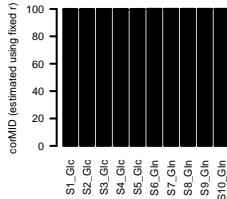

Serine (3TMS)

M+H = 99.5

M-H = 0.5

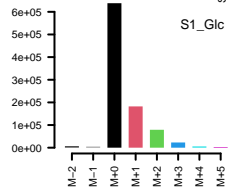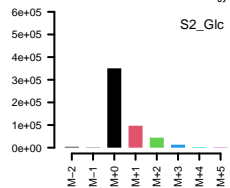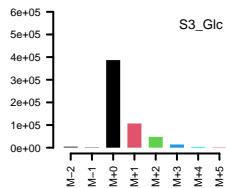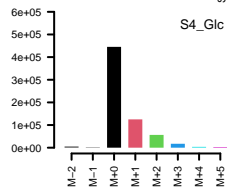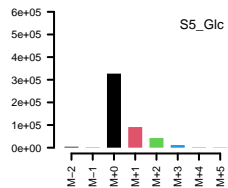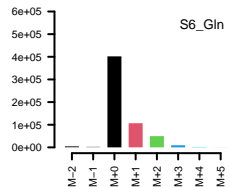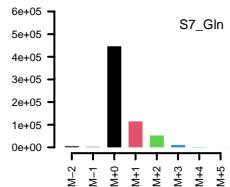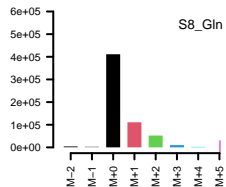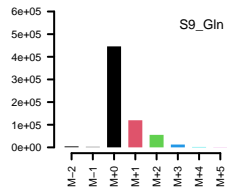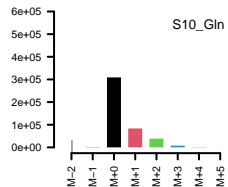

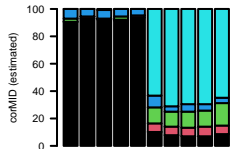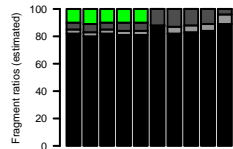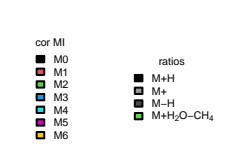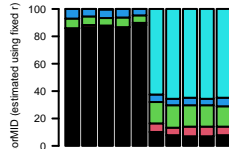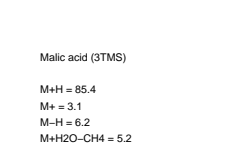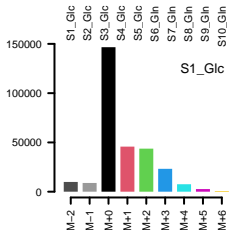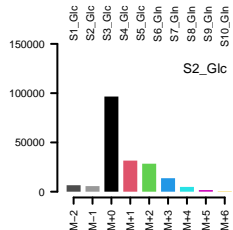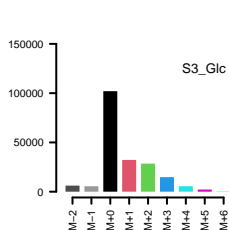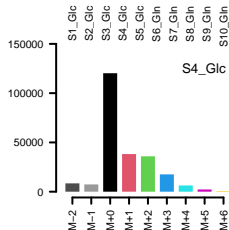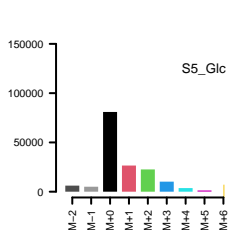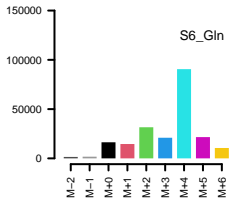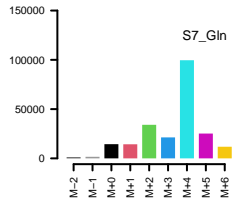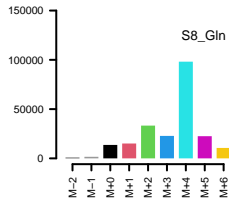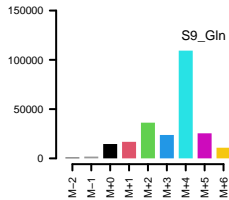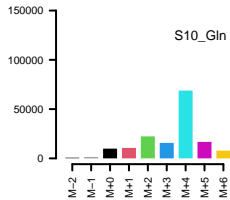

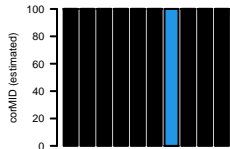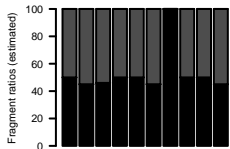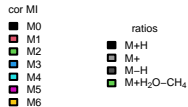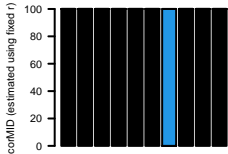

Threitol (4TMS)

M+H = 50

M-H = 50

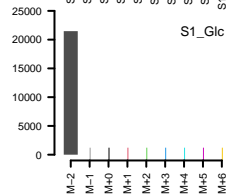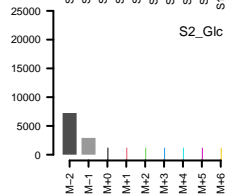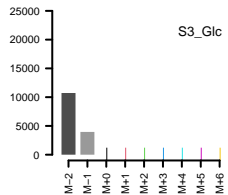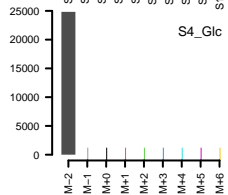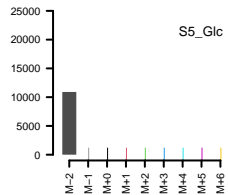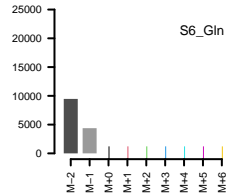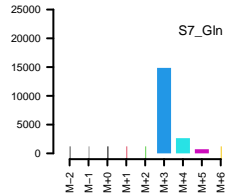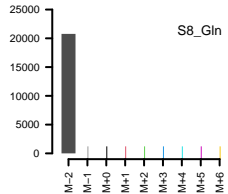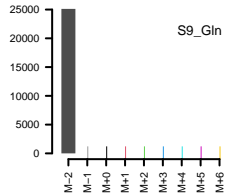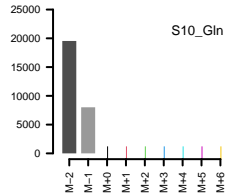

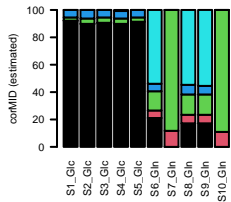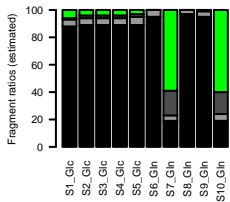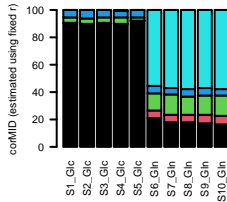

Aspartic acid (3TMS)

M+H = 89

M+ = 5

M-H = 2

M+H<sub>2</sub>O-CH<sub>4</sub> = 4

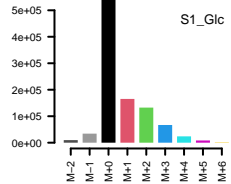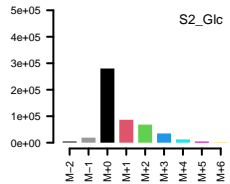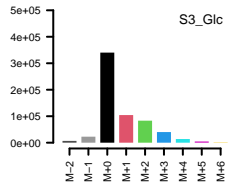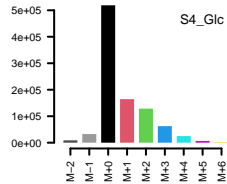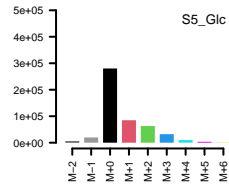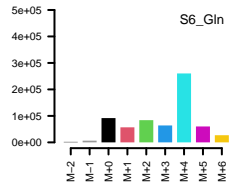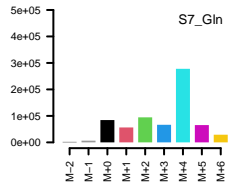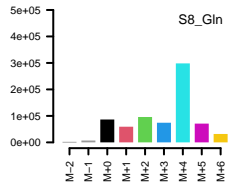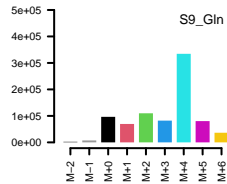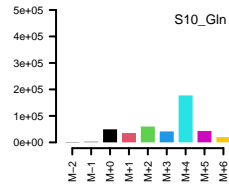

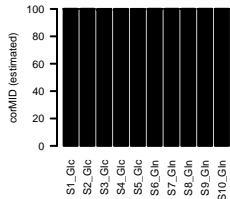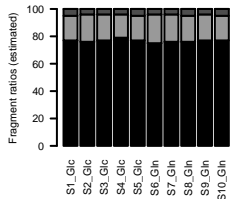

cor MI

- M0
- M1
- M2
- M3
- M4
- M5
- M6

ratios

- M+H
- M+
- M-H
- M+H<sub>2</sub>O-CH<sub>4</sub>

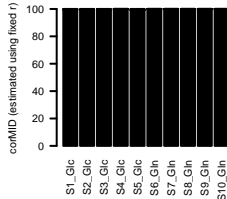

Methionine (2TMS)

M+H = 77

M+ = 19

M-H = 4

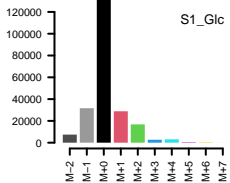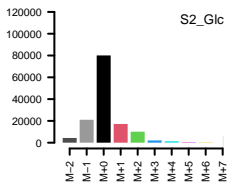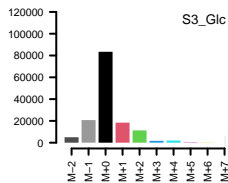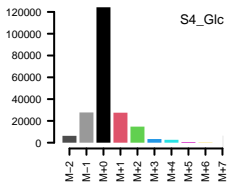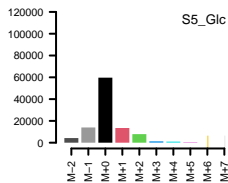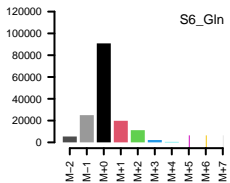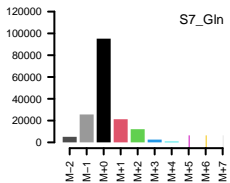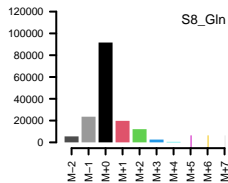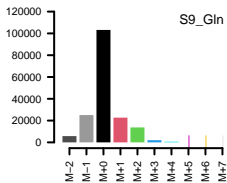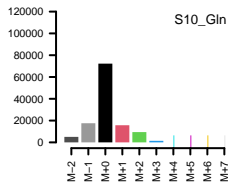

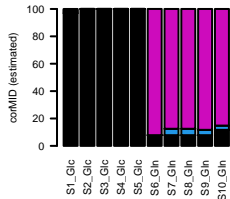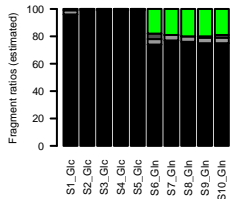

cor MI

- M0
- M1
- M2
- M3
- M4
- M5
- M6

ratios

- M+H
- M+
- M-H
- M+H<sub>2</sub>O-CH<sub>4</sub>

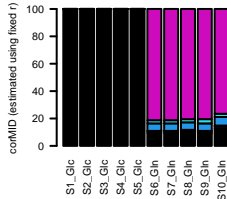

Pyroglutamic acid (2TMS)

M+H = 87.4

M+ = 3.5

M+H<sub>2</sub>O-CH<sub>4</sub> = 9.1

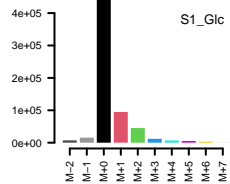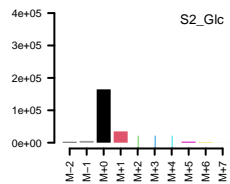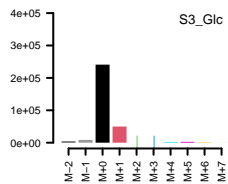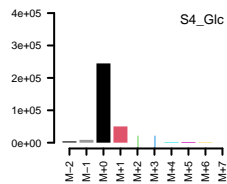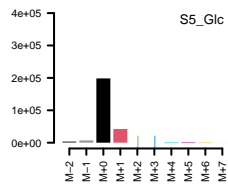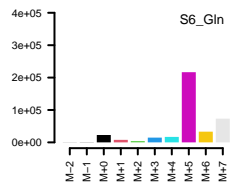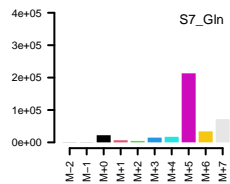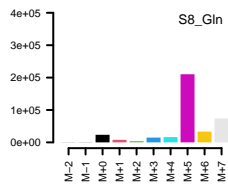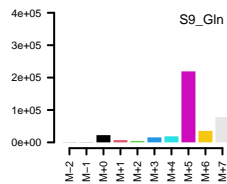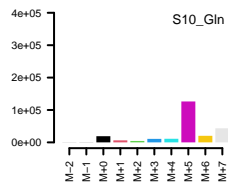

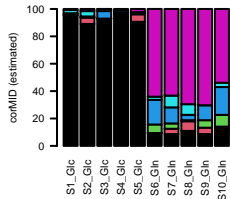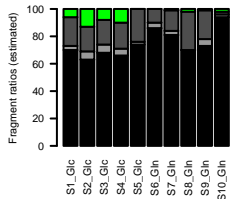

cor MI

M0  
M1  
M2  
M3  
M4  
M5  
M6

ratios

M+H  
M+  
M-H  
M+H<sub>2</sub>O-CH<sub>4</sub>

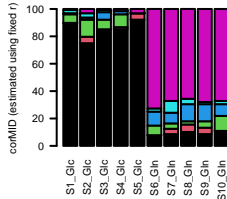

Glutaric acid, 2-hydroxy- (3TMS)

M+H = 74.9

M+ = 3.7

M-H = 19.4

M+H<sub>2</sub>O-CH<sub>4</sub> = 2.1

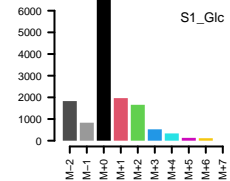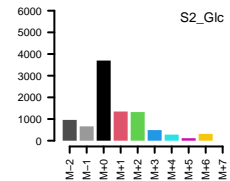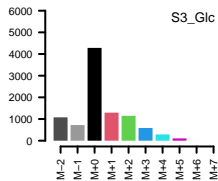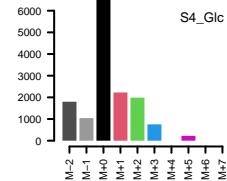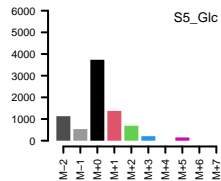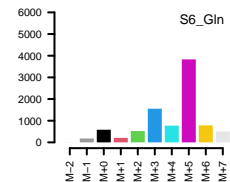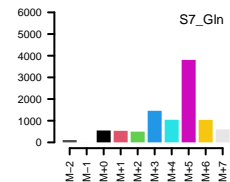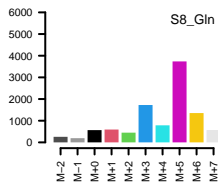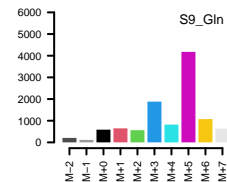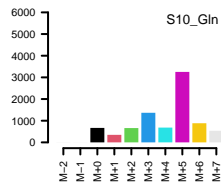



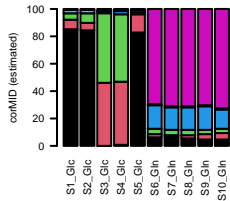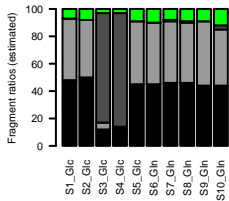

cor MI

M0  
M1  
M2  
M3  
M4  
M5  
M6

ratios

M+H  
M+  
M-H  
M+H<sub>2</sub>O-CH<sub>4</sub>

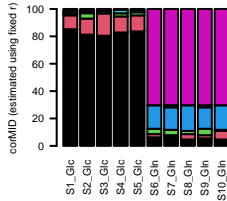

Glutaric acid, 2-oxo- (1MEOX) (2TM)

M+H = 45.7

M+ = 45.2

M-H = 0.5

M+H<sub>2</sub>O-CH<sub>4</sub> = 8.6

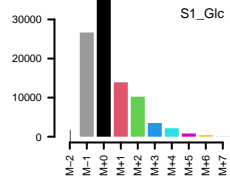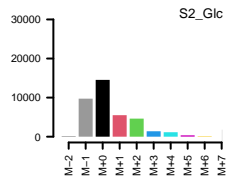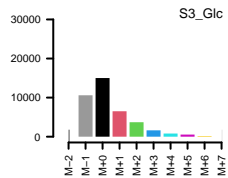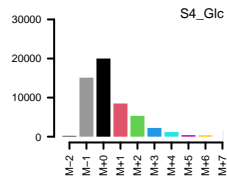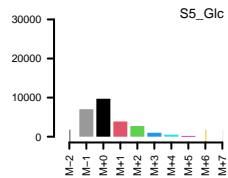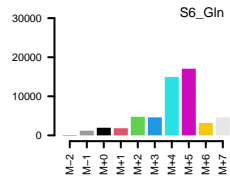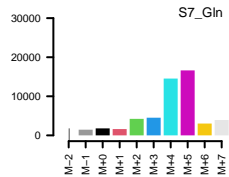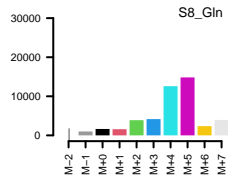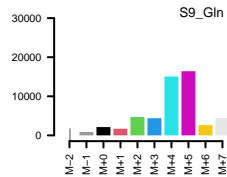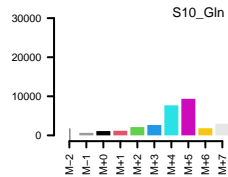

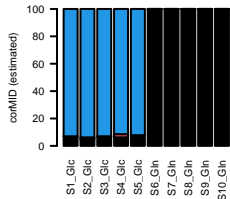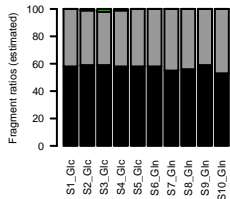

cor MI

- M0
- M1
- M2
- M3
- M4
- M5
- M6

ratios

- M+H
- M+
- M-H
- M+H<sub>2</sub>O-CH<sub>4</sub>

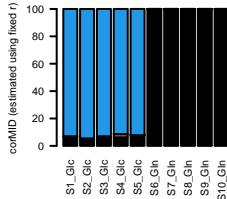

Phosphoenolpyruvic acid (3TMS)

M+H = 58

M+ = 42

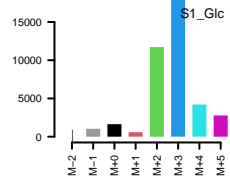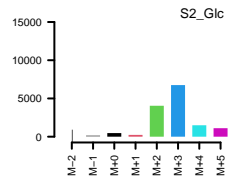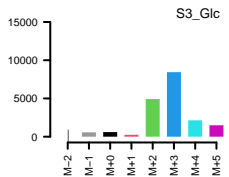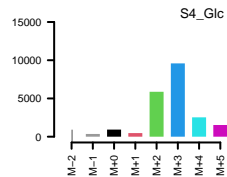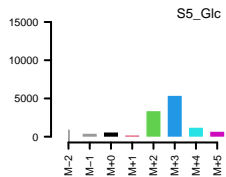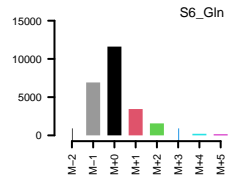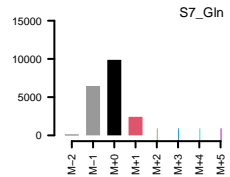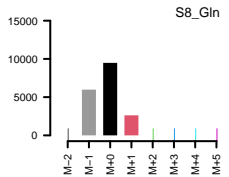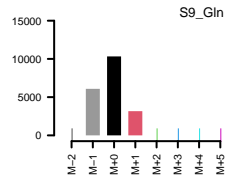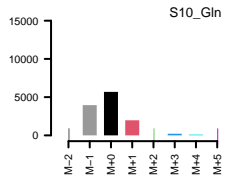

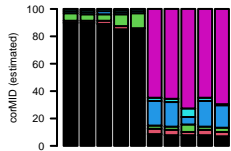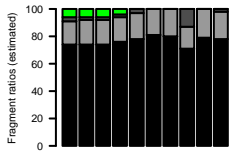

cor MI

- M0
- M1
- M2
- M3
- M4
- M5
- M6

ratios

- M+H
- M+
- M-H
- M+H<sub>2</sub>O-CH<sub>4</sub>

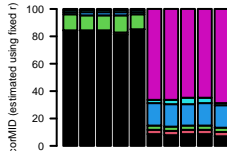

Glutamic acid (3TMS)

M+H = 79  
M+ = 19  
M-H = 2.1

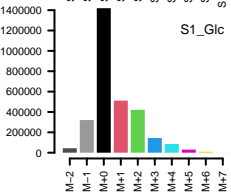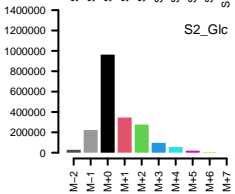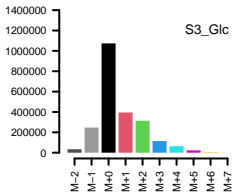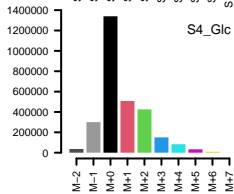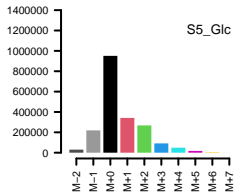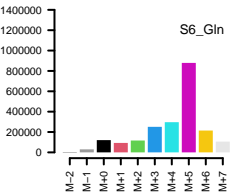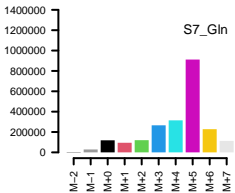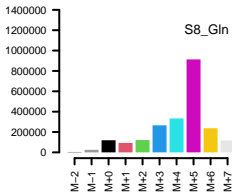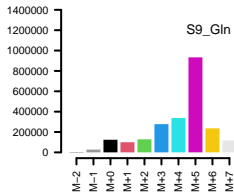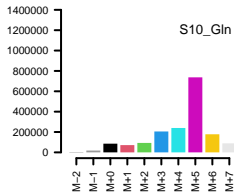

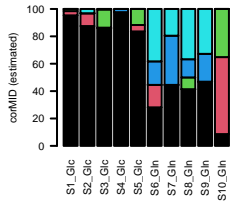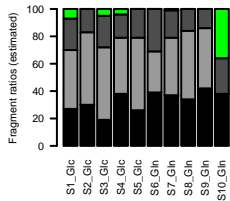

cor MI

M0  
M1  
M2  
M3  
M4  
M5  
M6

ratios

M+H  
M+  
M-H  
M+H<sub>2</sub>O-CH<sub>4</sub>

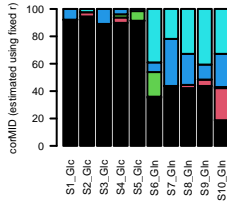

Asparagine (4TMS) BP1

M+H = 35.5

M+ = 43.5

M-H = 20.5

M+H<sub>2</sub>O-CH<sub>4</sub> = 0.5

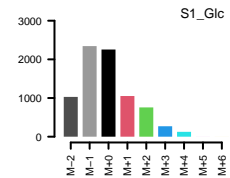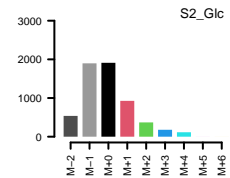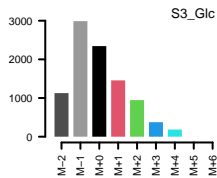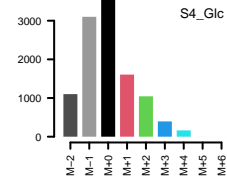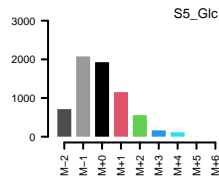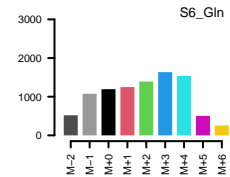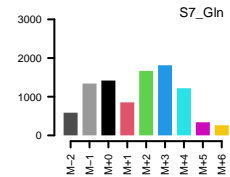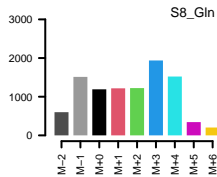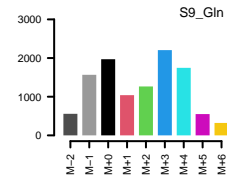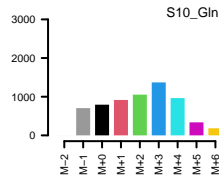

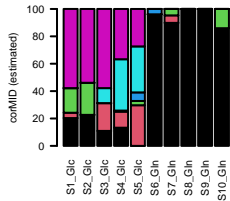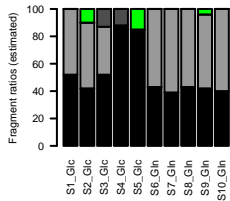

cor MI

- M0
- M1
- M2
- M3
- M4
- M5
- M6

ratios

- M+H
- M+
- M-H
- M+H<sub>2</sub>O-CH<sub>4</sub>

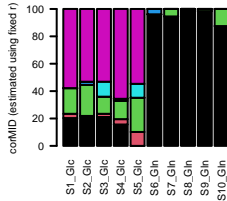

Ribose (1MEOX) (4TMS) MP

M+H = 45.7

M+ = 54.3

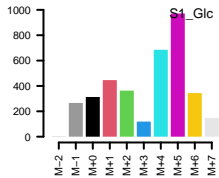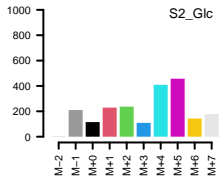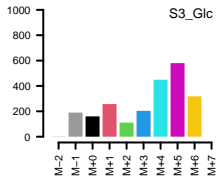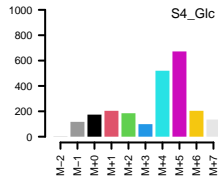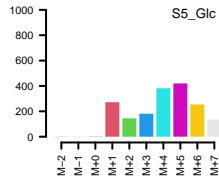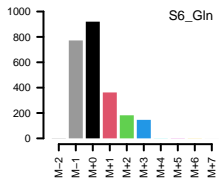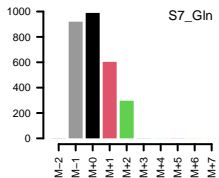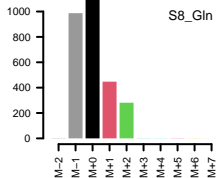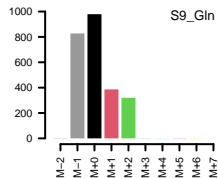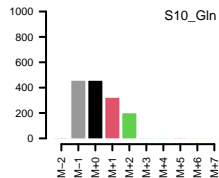

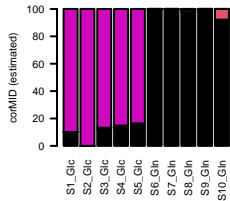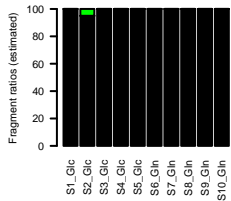

cor MI

- M0
- M1
- M2
- M3
- M4
- M5
- M6

ratios

- M+H
- M+
- M-H
- M+H<sub>2</sub>O-CH<sub>4</sub>

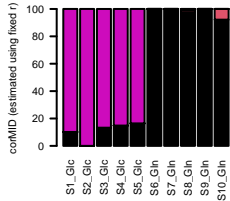

Xylitol (5TMS)

M+H = 100

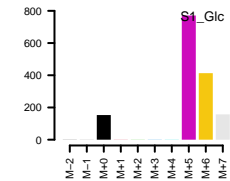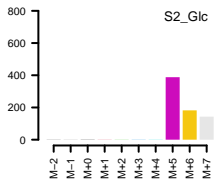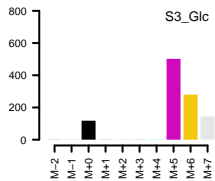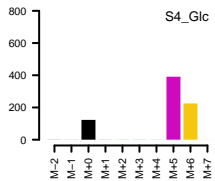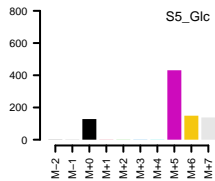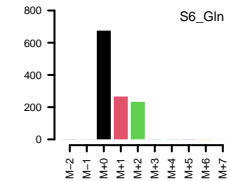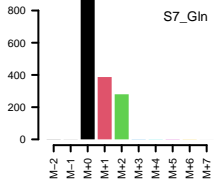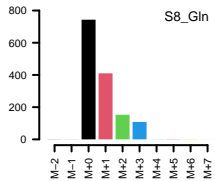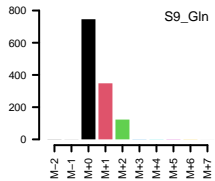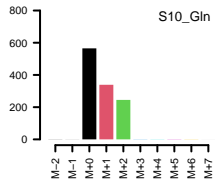

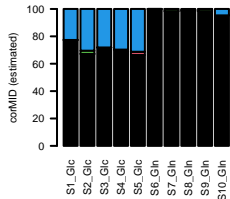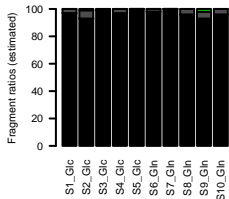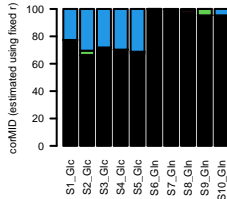

Glycerol-2-phosphate (4TMS)

M+H = 97

M-H = 3

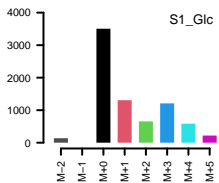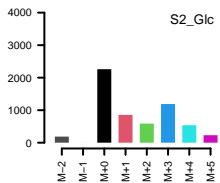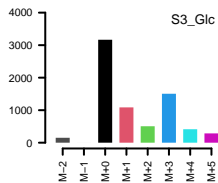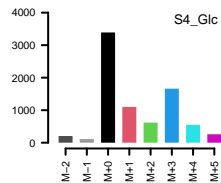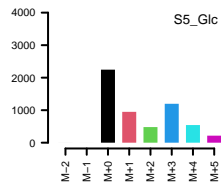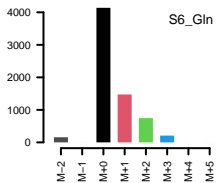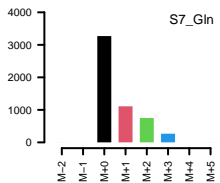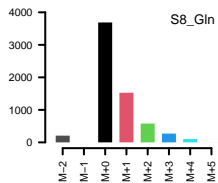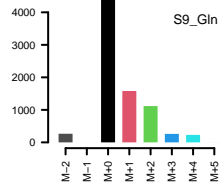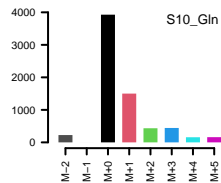

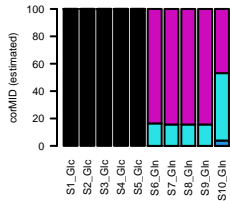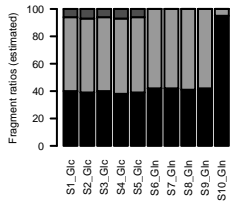

cor MI

- M0
- M1
- M2
- M3
- M4
- M5
- M6

ratios

- M+H
- M+
- M-H
- M+H<sub>2</sub>O-CH<sub>4</sub>

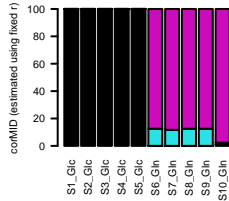

Glutamine (4TMS)

M+H = 41.1  
M+ = 55.8  
M-H = 3

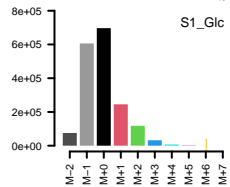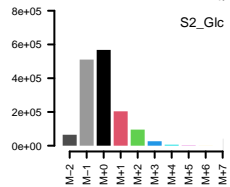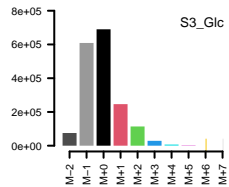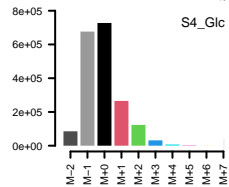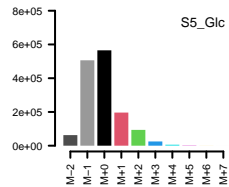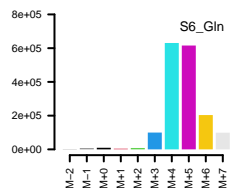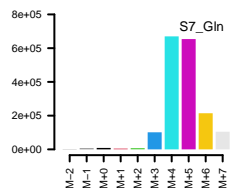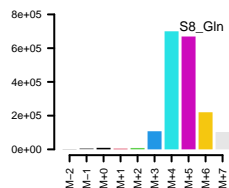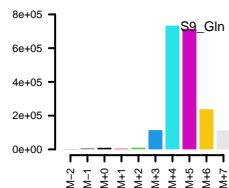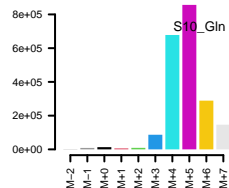



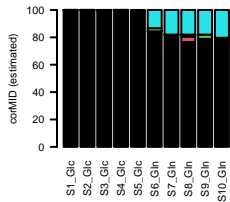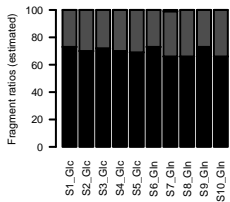

cor MI

- M0
- M1
- M2
- M3
- M4
- M5
- M6

ratios

- M+H
- M+
- M-H
- M+H<sub>2</sub>O-CH<sub>4</sub>

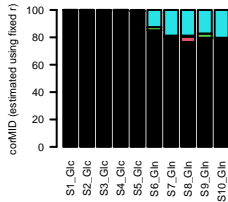

Putrescine (4TMS)

M+H = 70  
M-H = 30

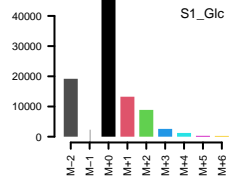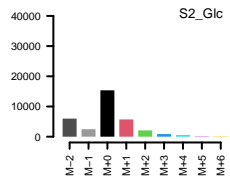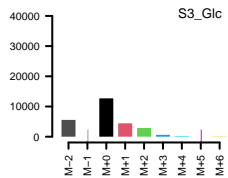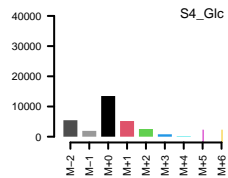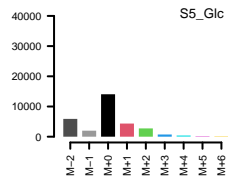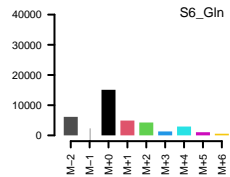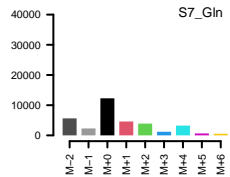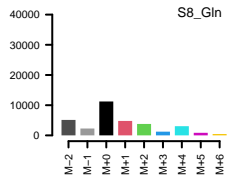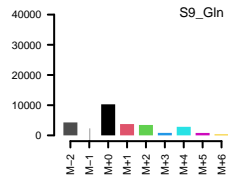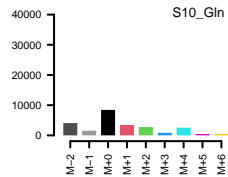

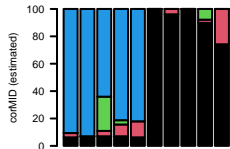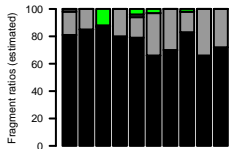

cor MI

- M0
- M1
- M2
- M3
- M4
- M5
- M6

ratios

- M+H
- M+
- M-H
- M+H<sub>2</sub>O-CH<sub>4</sub>

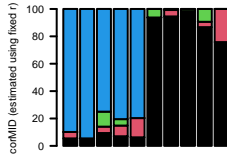

Dihydroxyacetone phosphate (1MEOx)

M+H = 81.1

M+ = 18.9

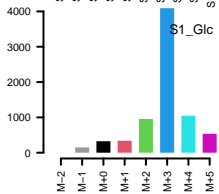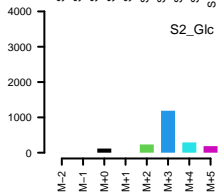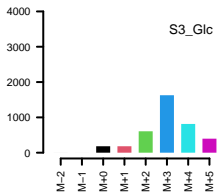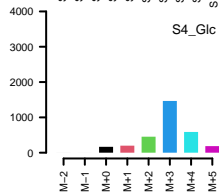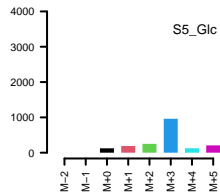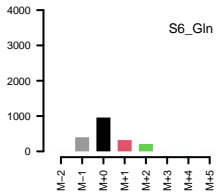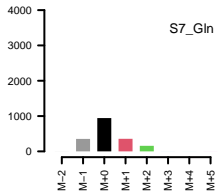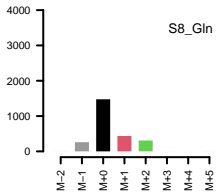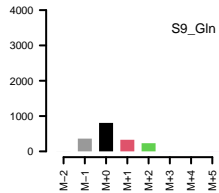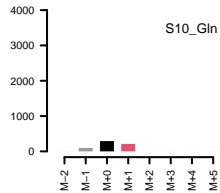

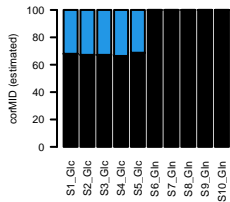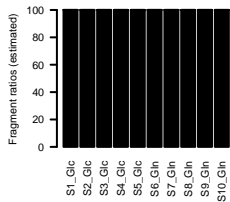

cor MI

- M0
- M1
- M2
- M3
- M4
- M5
- M6

ratios

- M+H
- M+
- M-H
- M+H<sub>2</sub>O-CH<sub>4</sub>

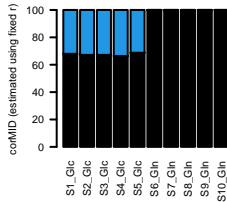

Glycerol-3-phosphate (-CH<sub>4</sub>)

M+H = 100

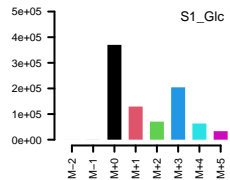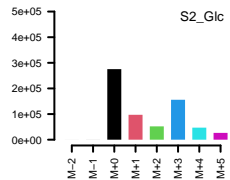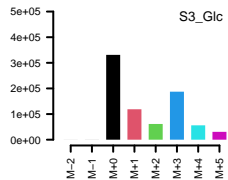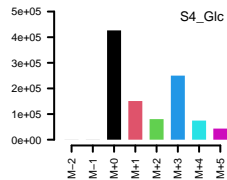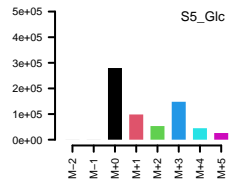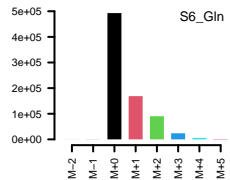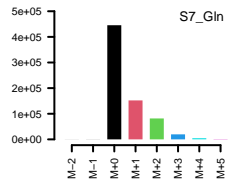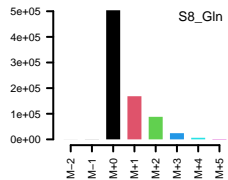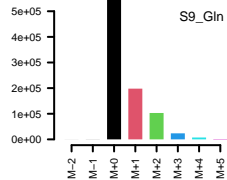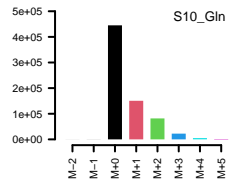

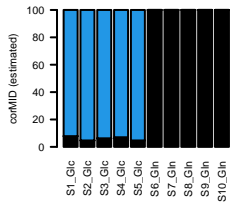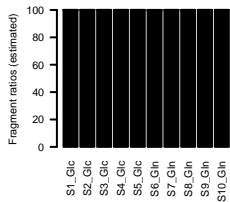

cor MI

- M0
- M1
- M2
- M3
- M4
- M5
- M6

ratios

- M+H
- M+
- M-H
- M+H<sub>2</sub>O-CH<sub>4</sub>

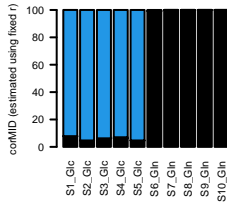

Glyceric acid-3-phosphate (4TMS)

M+H = 100

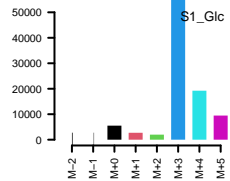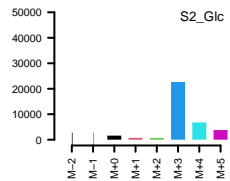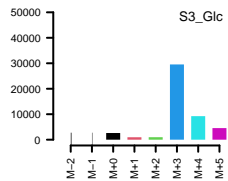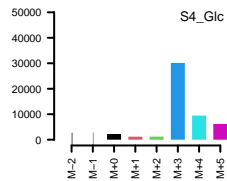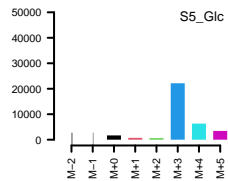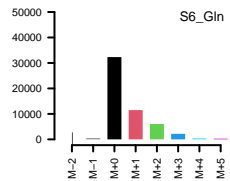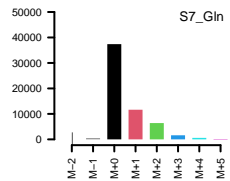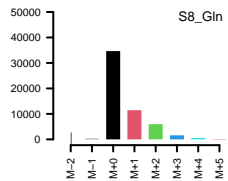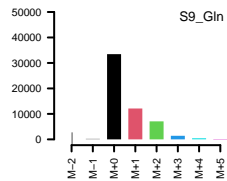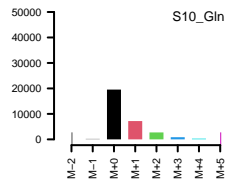

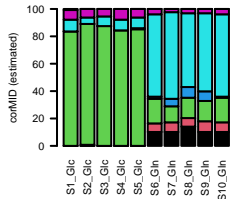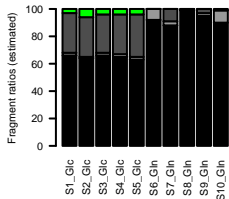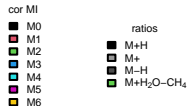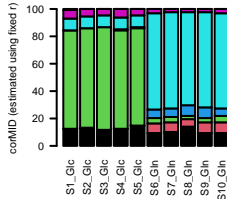

Citric acid (4TMS)

M+H = 77.4

M+ = 2

M-H = 18.6

M+H<sub>2</sub>O-CH<sub>4</sub> = 2

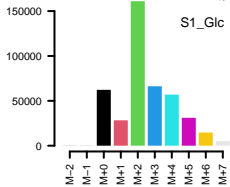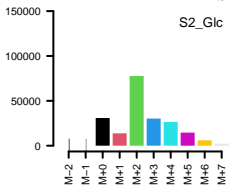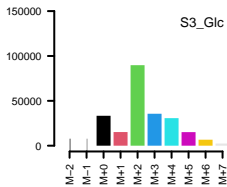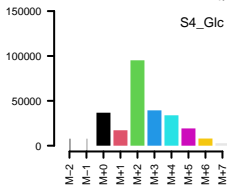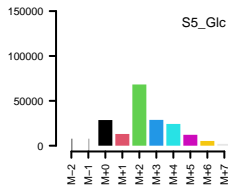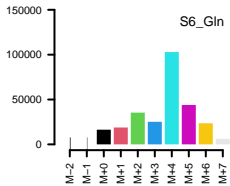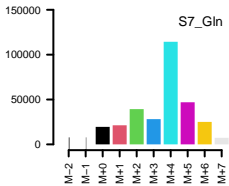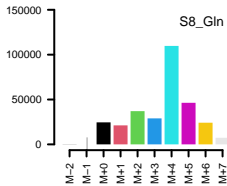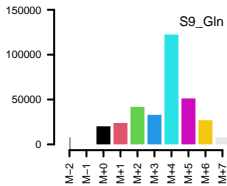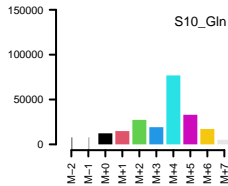

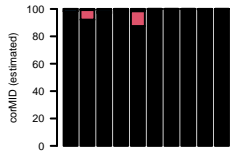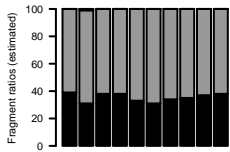

cor MI

- M0
- M1
- M2
- M3
- M4
- M5
- M6

ratios

- M+H
- M+
- M-H
- M+H<sub>2</sub>O-CH<sub>4</sub>

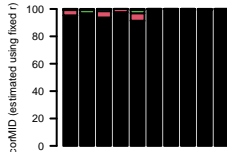

Adenine (2TMS)

M+H = 36

M+ = 64

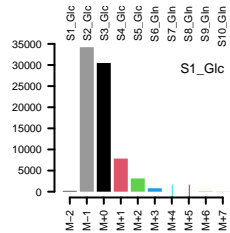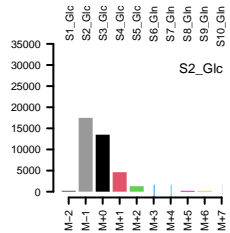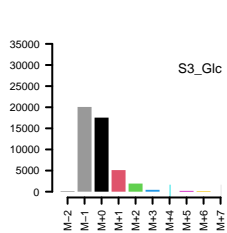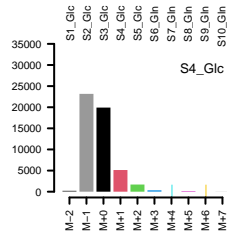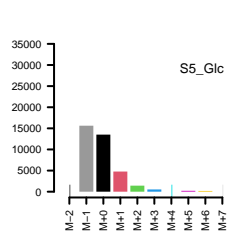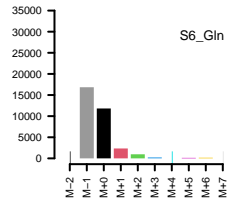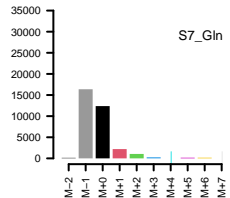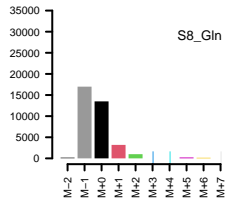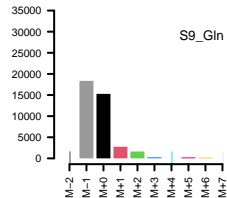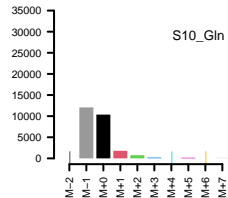

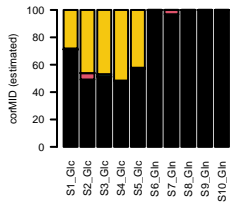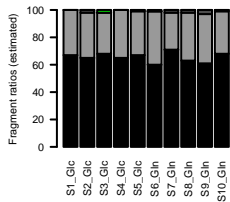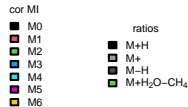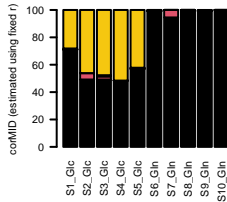

Fructose (1MEOX) (5TMS) MP

M+H = 66

M+ = 33

M-H = 1

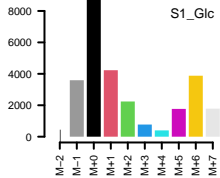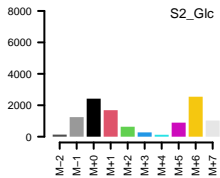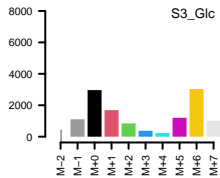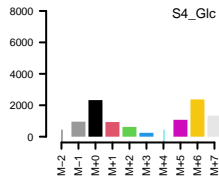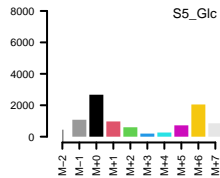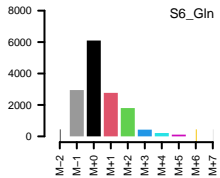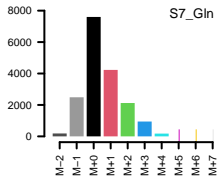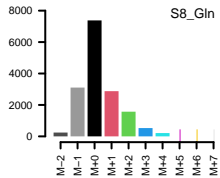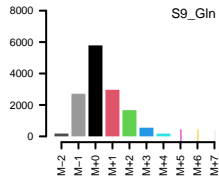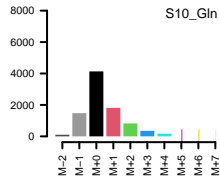

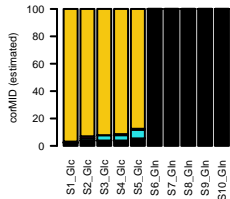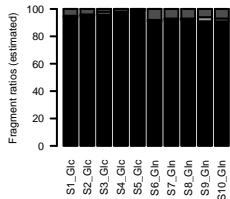

cor MI

- M0
- M1
- M2
- M3
- M4
- M5
- M6

ratios

- M+H
- M+
- M-H
- M+H<sub>2</sub>O-CH<sub>4</sub>

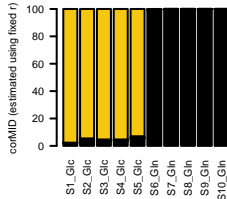

Glucose (1MEOX) (5TMS) BP

M+H = 93.5

M+ = 1

M-H = 5.5

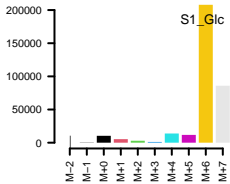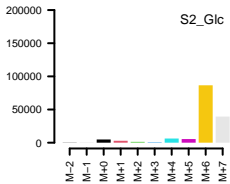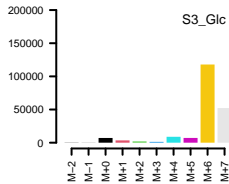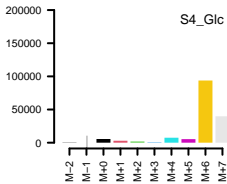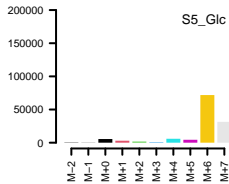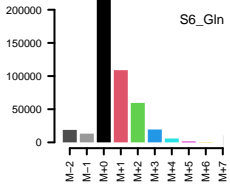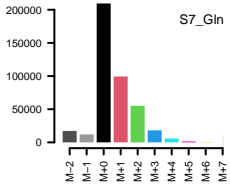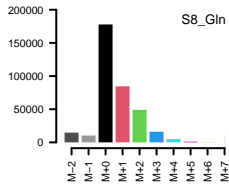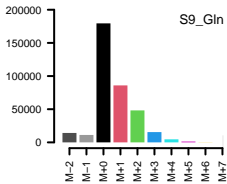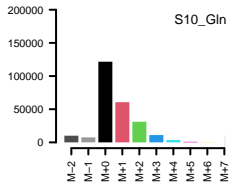



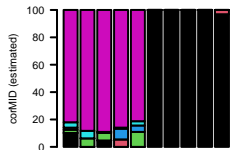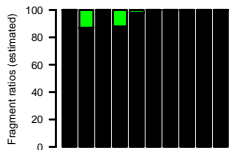

cor MI

- M0
- M1
- M2
- M3
- M4
- M5
- M6

ratios

M+H  
M+  
M-H  
M+H<sub>2</sub>O-CH<sub>4</sub>

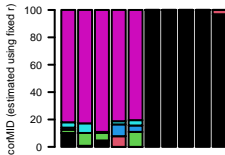

Ribose-5-phosphate (1 MEOX) (5TM)

M+H = 100

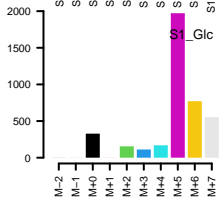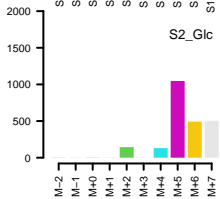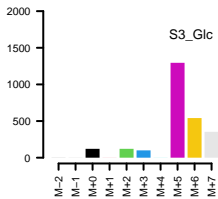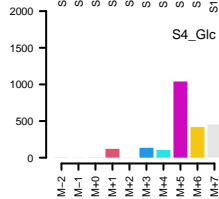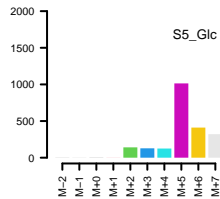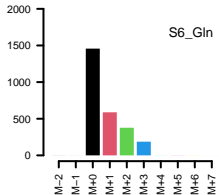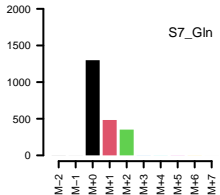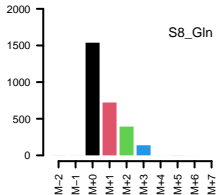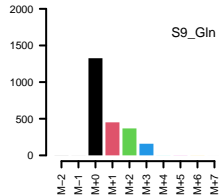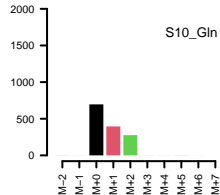

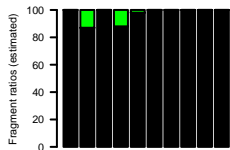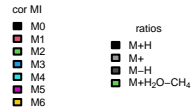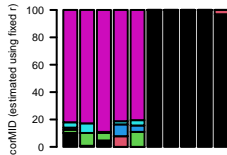

Ribulose-5-phosphate (1MEOX) (5T)

M+H = 100

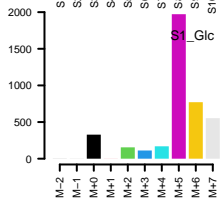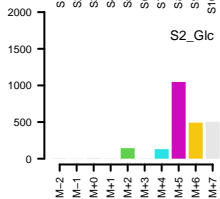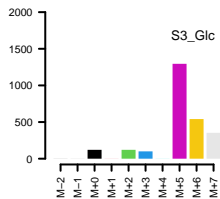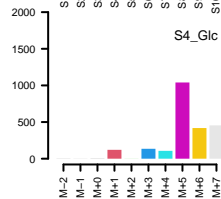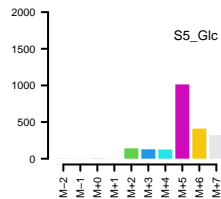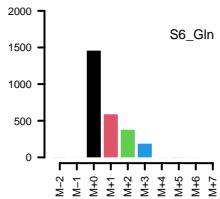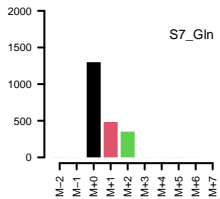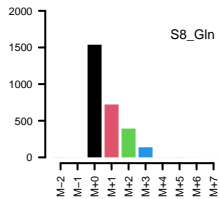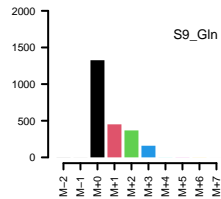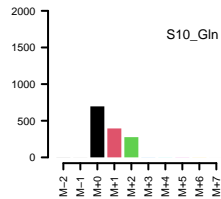

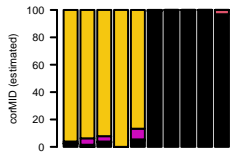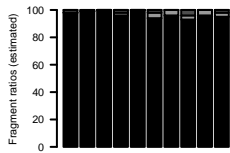

cor MI

- M0
- M1
- M2
- M3
- M4
- M5
- M6

ratios

- M+H
- M+
- M-H
- M+H<sub>2</sub>O-CH<sub>4</sub>

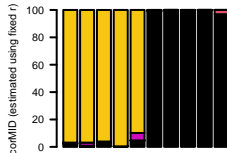

Glucose-6-phosphate (1MEOX) (6TM)

M+H = 96  
M+ = 2.5  
M-H = 1.5

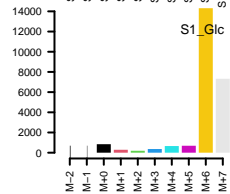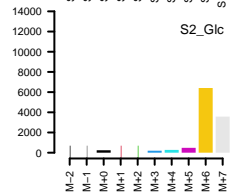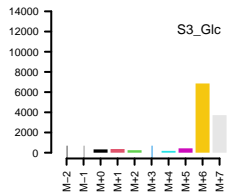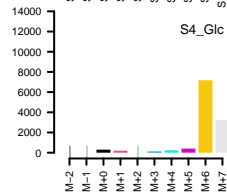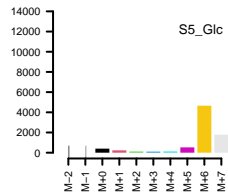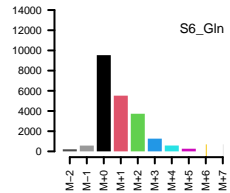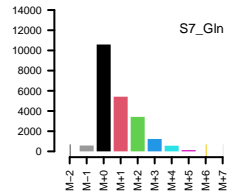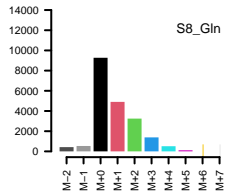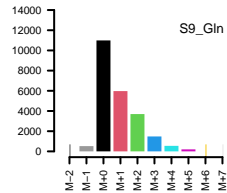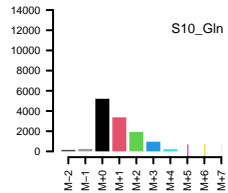

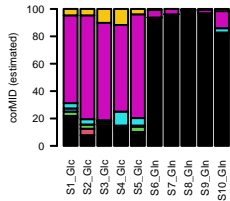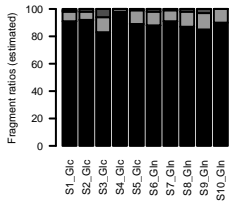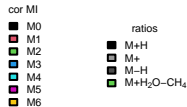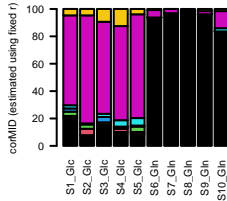

Adenosine, alpha- (4TMS) MP

M+H = 88.6

M+ = 9.9

M-H = 1.5

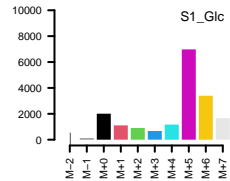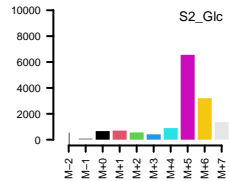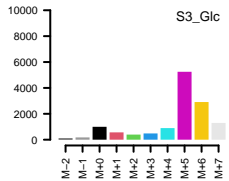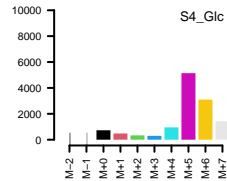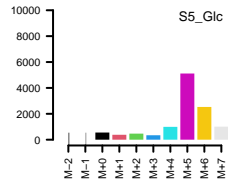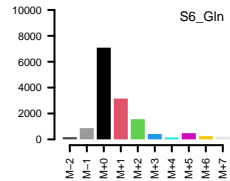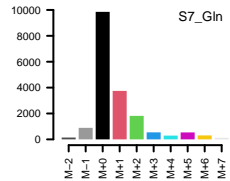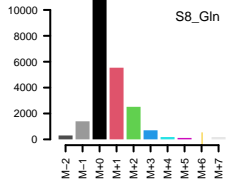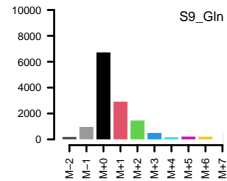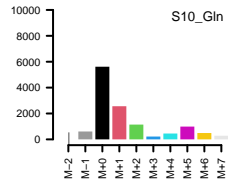

Supplement: s1 [file s1]
