# Supplementary material for: A Flexible Tool to Correct Superimposed Mass Isotopologue Distributions in GC-APCI-MS Flux Experiments
Source: MDPI journal article supplement (doi:10.3390/metabo12050408), 2022-04-29
Supplement: s1 [file s1]

# Supporting Information: A flexible tool to correct superimposed mass isotopologue distributions in GC-APCI-MS flux experiments

Jennifer Langenhan <sup>1</sup>, Carsten Jaeger <sup>1</sup>, Katharina Baum <sup>2</sup>, Mareike Simon <sup>2</sup>, and Jan Lisec <sup>1,\*</sup>

<sup>1</sup> Bundesanstalt für Materialforschung und -prüfung (BAM), Division 1 Analytical Chemistry, Richard-Willstätter-Straße 11, 12489 Berlin, Germany

<sup>2</sup> Max-Delbrück-Center for Molecular Medicine (MDC), Mathematical Modeling of Cellular Processes, Robert-Rössle-Straße 10, 13125 Berlin, Germany

<sup>3</sup> Hasso Plattner Institute, Digital Engineering Faculty, University of Potsdam, Prof.-Dr.-Helmert-Straße 2-3, 14482 Potsdam, Germany

\* Correspondence: jan.lisec@bam.de; Tel.: 0049 (0)30 8104 5891

**Table S1.** Comparison of features of IsoCor, MIDcor, IsoCorrectoR, and CorMID.

| Corrects for:                          | IsoCor [12] | MIDcor [10] | IsoCorrectoR [11] | CorMID |
|----------------------------------------|-------------|-------------|-------------------|--------|
| natural abundance                      | x           | x           | x                 | x      |
| tracer purity                          |             |             | x                 |        |
| overlap with other Compounds           |             | x           |                   |        |
| proton loss                            |             | x           |                   | x      |
| overlap with other in-source fragments |             |             |                   | x      |
| overlap with rearrangement products    |             |             |                   | x      |

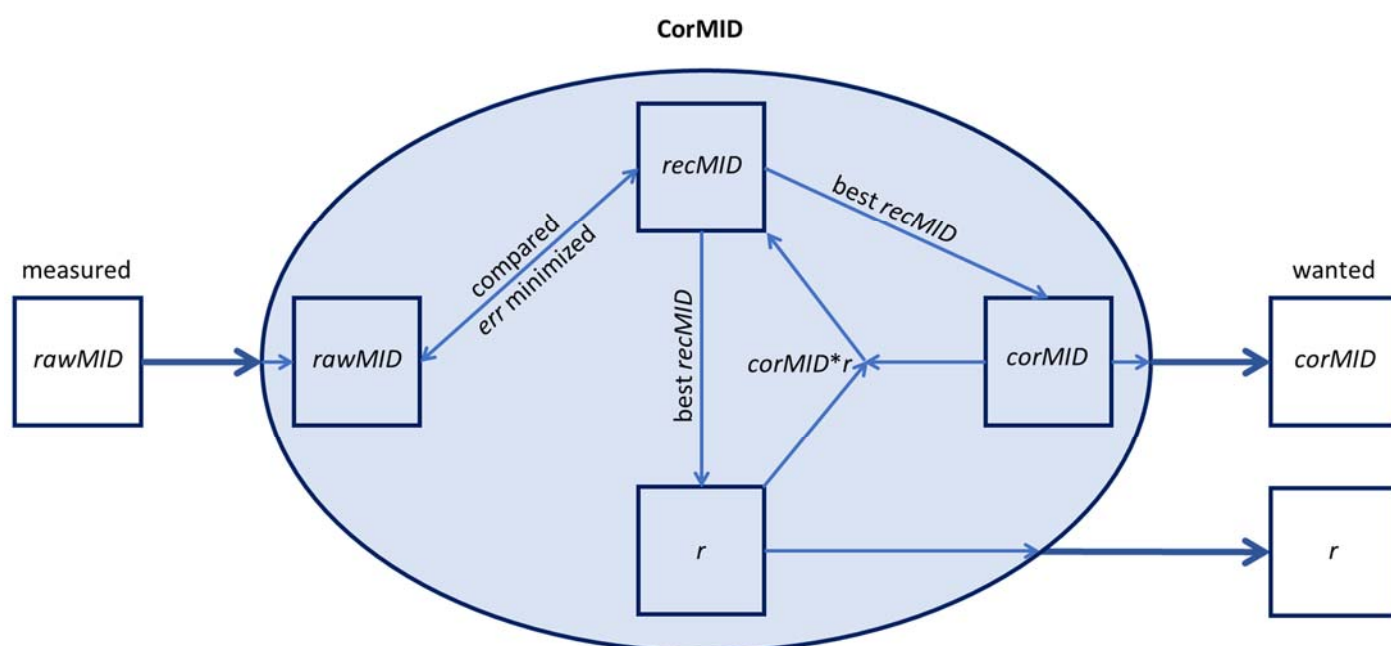

**Figure S1.** The function CorMID works as follows: a residual error (*err*) between an observed vector of measured ion intensities (*rawMID*) and a reconstructed vector of similar size (*recMID*) is calculated out of a fragment distribution vector (*r*) and the corrected MID (*corMID*). The size of *r* is dependent on the number of fragments considered and the size of vector *corMID* is dependent on the number carbon atoms within the molecule. Under normal operating conditions *r* and *corMID* are estimated until the best *recMID* (*err* minimized) is found. *r* or *corMID* can also be manually fixed. That leads to a unique solution of the function. The *corMID* and *r*, which lead to the best *recMID* are the output of CorMID.

**Figure S2.** Evaluation of library compound 22, 3-DEHYDROSHIKIMATE (1MeOx, 3TMS). (A) The measured intensities of the compound are normalized to the vector sum. The main adduct  $[M+H]^+$  is represented as M+0 in the spectrum. The true MID (*corMID*) and fragment distribution  $r$  are unknown, which is indicated by two question marks. (B) Assuming no artificial labelling we can estimate the fragment distribution which fits the observed data best and use this  $r$  to reconstruct the expected measurement values. The error between the reconstructed MID and the measured MID is annotated in the spectrum. (C) Using  $r$  as obtained in (B) as a fixed parameter and estimating the optimal MID, we observe a much better fit of the measured data when assuming approximately 23% M1 labelling. (D) For comparison we can estimate MID and  $r$  in parallel which further reduces the fitting error in the reconstructed MID. In conclusion, this example shows that dubious peak intensities, i.e. as a result of impurities, will hamper the correct estimation of MID and  $r$ . In the example the M+1 is most likely wrong and shows too high intensity. We found such problems in approximately 10% of all library samples.

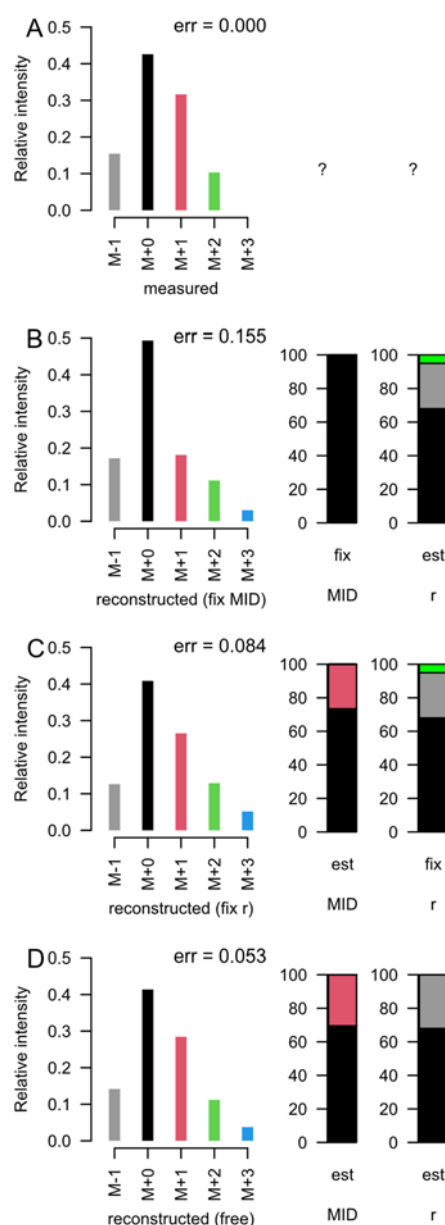

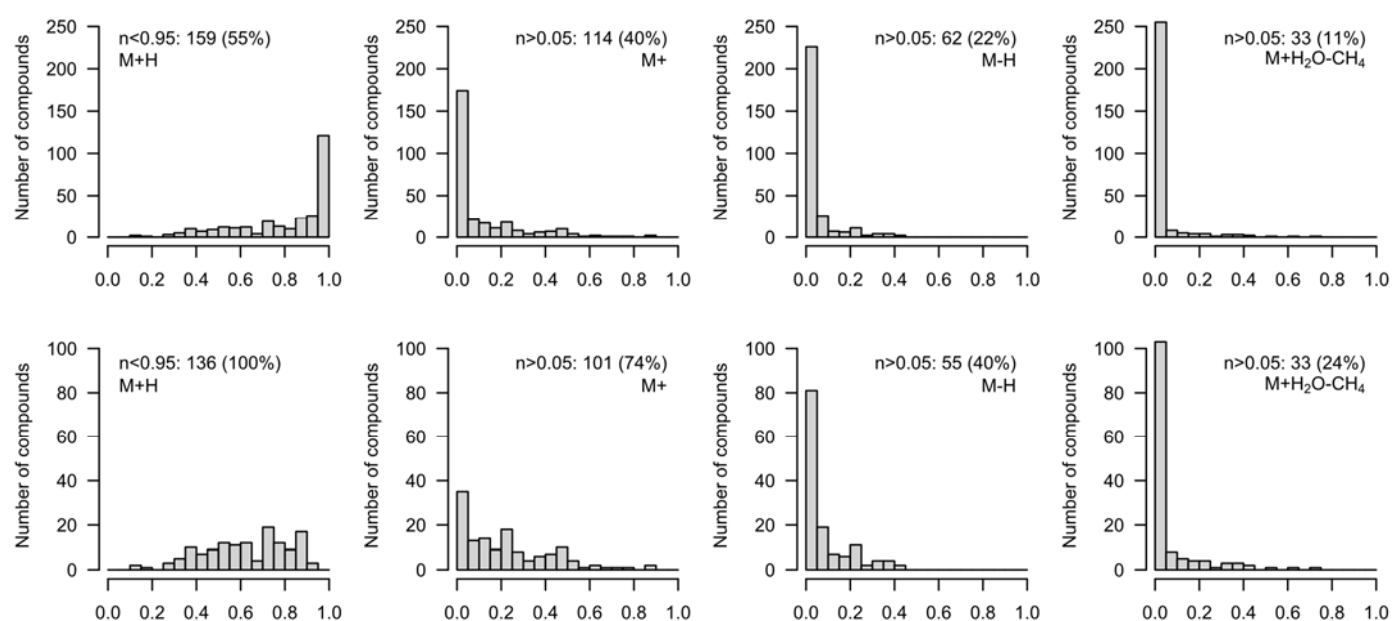

**Figure S3.** Distribution of calculated fragment fractions for all 288 compounds with  $M_0=100\%$  (top row, similar to Figure 3). For comparison we estimated *corMID* using a fixed  $r$  (with  $[M+H]^+ = 1$ ) to find the number of compounds that show  $>5\%$  deviation from the correct  $M_0=100\%$  without considering fragments other than  $[M+H]^+$ . The  $r$  for this subset of 136 compounds is depicted in the bottom row. All 33 compounds which showed the fragment  $[M+H_2O-CH_4]^+$  did yield a wrong  $M_0$  when the fragment was not considered. The same was true for most of the  $[M]^+$  (101 of 114) and  $[M-H]^+$  (55 of 62) fragments.

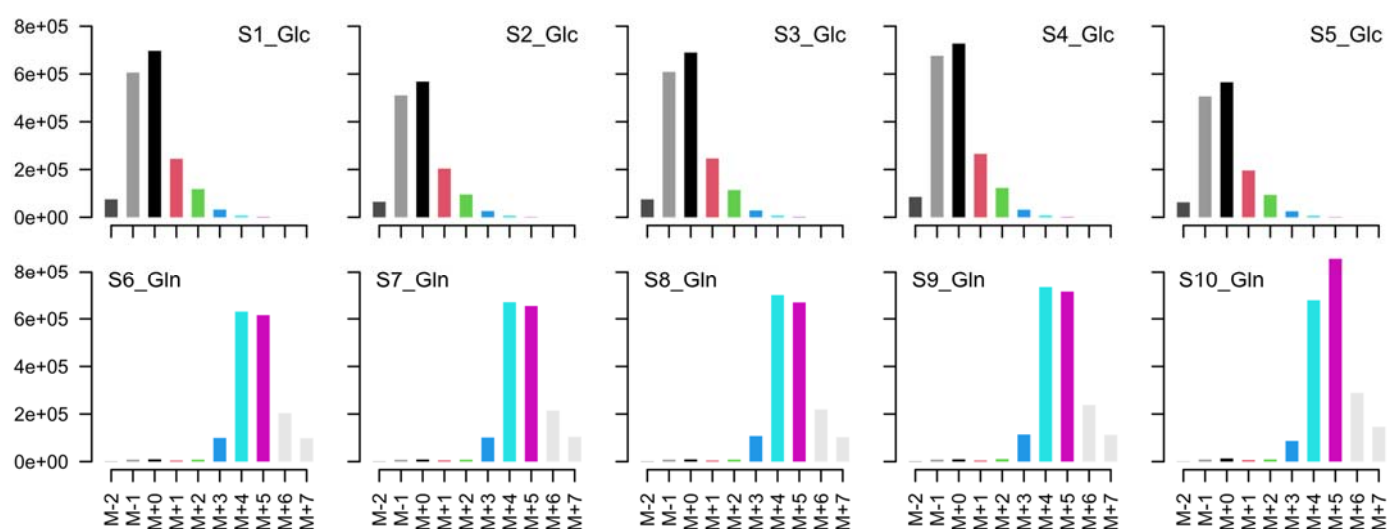

**Figure S4.** *rawMID* intensities of Glc after Glc labeling (upper row), *rawMID* intensities of Gln after Gln labeling (bottom row). Notice the intensity difference for the fifth replicate, leading to a different MID and fragment distribution see Figure 5A-B.

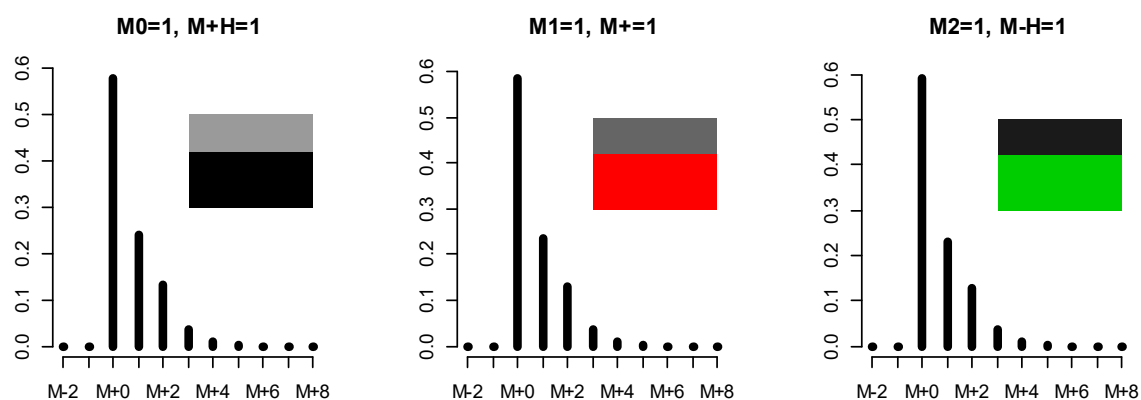

**Figure S5.** Three reconstructed *rawMIDs* (equivalent to normalized measured ion intensities) based on MID and fragment distribution as presented in the figure title. Spectra are identical within the limits of APCI-MS (error ~2% deviation).

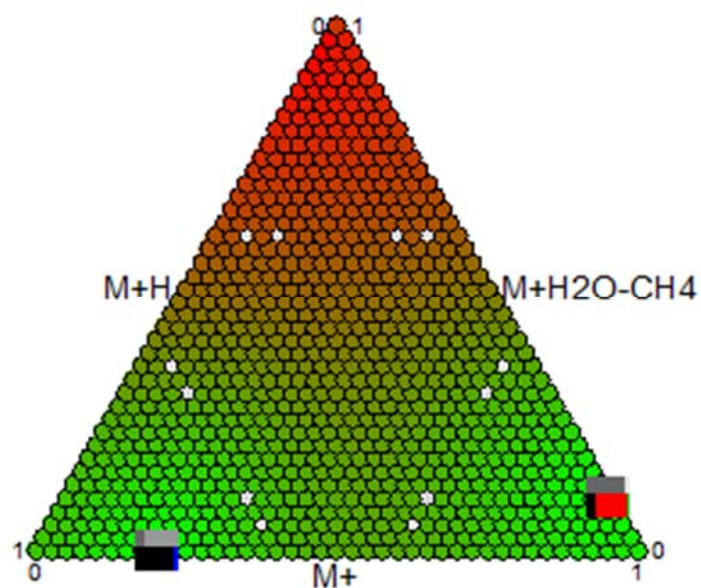

**Figure S6.** Heuristic error distribution of free fit (i.e. estimating *corMID* and fragment distribution at the same time) for 20% M3 pyruvic acid with 10%  $[M]^+$ . Each circle within the triangle defines a unique combination of  $r$  (fragment distribution), allowing here only 3 fragments to facilitate visualization. The color of each circle indicates the smallest fitting error achievable for this  $r$ . Without any weighting two equivalent local minima exist in the solution space.

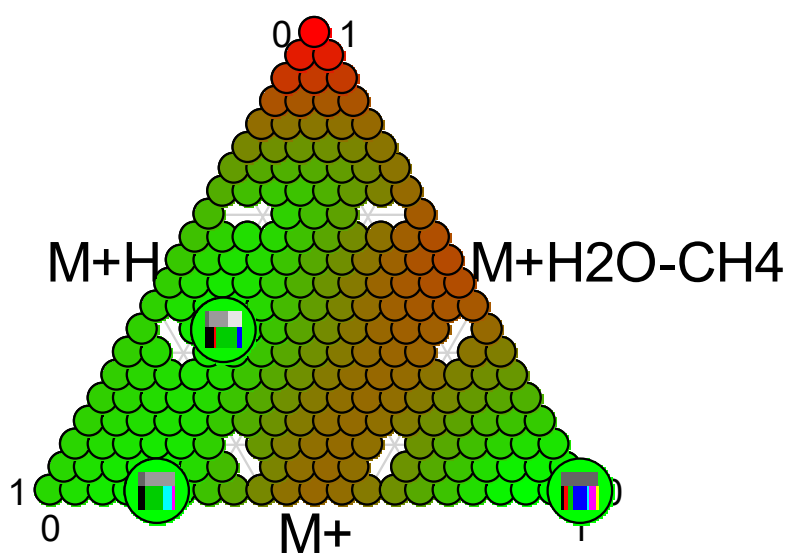

**Figure S7.** Heuristic error distribution of free fit (i.e. estimating MID and fragment distribution at the same time) for Citrulline with MID={0.2,0,0.5,0,0.25,0.05,0} and fragment distribution={0.8 [M+H]<sup>+</sup>, 0.2 [M]<sup>+</sup>}. Without any weighting three local minima exist in the solution space.
